# Supplementary material for: RIOK3 promotes mTORC1 activation by facilitating SLC7A2-mediated arginine uptake in pancreatic ductal adenocarcinoma
Source: publisher site journal article supplement (doi:10.18632/aging.204528), 2023-02-24
Supplement: Supplementary file [file aging-v15i4-204528-supplementary-material-SD1.pdf]

SUPPLEMENTARY FIGURE

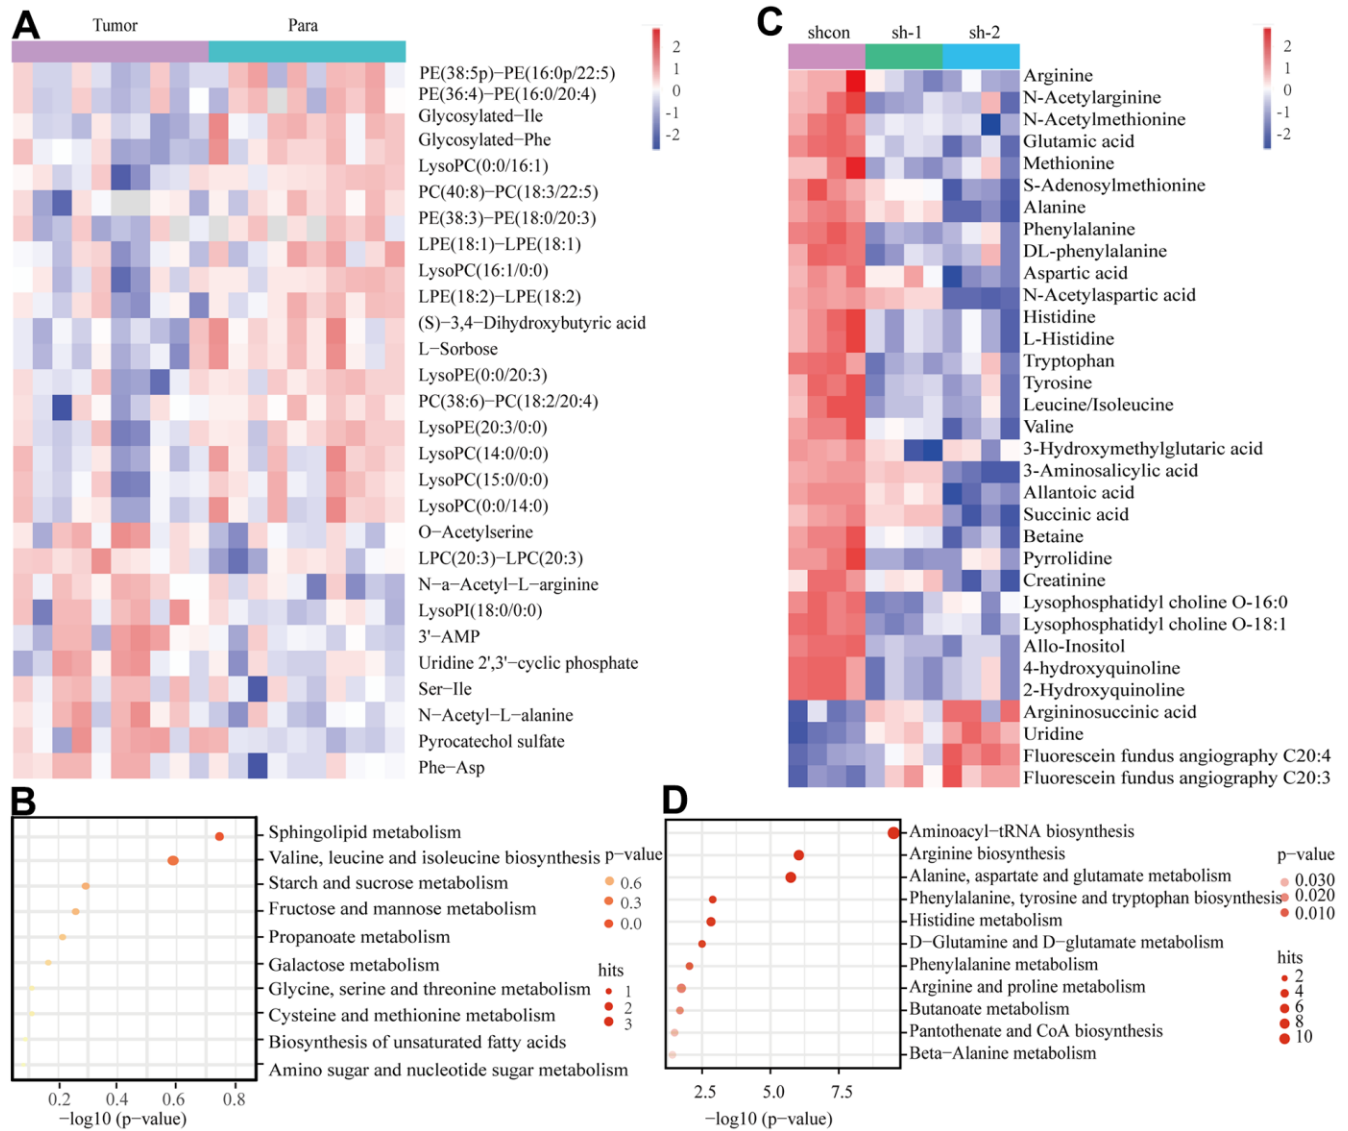

**Supplementary Figure 1.** (A) Heatmap of the differential metabolites of low-RIOK3 expression-PDAC tissues compared with the paired adjacent normal tissues based on nontargeted metabolomic analysis ( $|\text{Log}_2\text{FC}| > 1, p < 0.05$ ). Blue represents the decreasing trend, and red represents the increasing trend. Paired Samples Wilcoxon test. (B) KEGG pathway enrichment analysis of the differential metabolites in A. (C) Heatmap of the differential metabolites related to RIOK3 knockdown PDAC cells based on nontargeted metabolomic analysis ( $|\text{Log}_2\text{FC}| > 0.3, p < 0.05$ ). Paired Samples Wilcoxon test. (D) KEGG pathway enrichment analysis of the differential metabolites in C.
